# Supplementary material for: Comprehensive Comparative Analysis Sheds Light on the Patterns of Microsatellite Distribution across Birds Based on the Chromosome-Level Genomes
Source: MDPI journal article supplement (doi:10.3390/ani13040655), 2023-02-13
Supplement: s1 [file s1]

## SUPPLEMENTARY MATERIALS

**Table S1.** Species information of SSRs analysis.

| Order          | Species                        | Assembly level | Genome coverage | Sequencing technology                                                               | Genome size (bp) | Accession       |
|----------------|--------------------------------|----------------|-----------------|-------------------------------------------------------------------------------------|------------------|-----------------|
| Galliformes    | <i>Coturnix japonica</i>       | Chromosome     | 73x             | Illumina GA IIx                                                                     | 927656957        | GCF_001577835.2 |
| Galliformes    | <i>Meleagris gallopavo</i>     | Chromosome     | 35.0x           | Illumina GAII; Sanger; 454                                                          | 1115474681       | GCF_000146605.3 |
| Galliformes    | <i>Gallus gallus</i>           | Chromosome     | 102.01x         | PacBio Sequel I CLR; Illumina NovaSeq; Arima<br>Genomics Hi-C; Bionano Genomics DLS | 1053332251       | GCF_016699485.2 |
| Galliformes    | <i>Numida meleagris</i>        | Chromosome     | 100.0x          | Illumina HiSeq                                                                      | 1043264150       | GCF_002078875.1 |
| Anseriformes   | <i>Oxyura jamaicensis</i>      | Chromosome     | 60.0x           | Illumina NovaSeq                                                                    | 1147585764       | GCF_011077185.1 |
| Anseriformes   | <i>Heteronetta atricapilla</i> | Chromosome     | 60.0x           | Illumina NovaSeq                                                                    | 1151880818       | GCA_011075105.1 |
| Anseriformes   | <i>Cygnus olor</i>             | Chromosome     | 60.23x          | PacBio Sequel I CLR; Illumina NovaSeq; Arima<br>Genomics Hi-C; Bionano Genomics DLS | 1134186642       | GCF_009769625.2 |
| Anseriformes   | <i>Aythya fuligula</i>         | Chromosome     | 64.03x          | PacBio Sequel I CLR; Illumina NovaSeq; Arima<br>Genomics Hi-C; Bionano Genomics DLS | 1127004725       | GCF_009819795.1 |
| Anseriformes   | <i>Anas platyrhynchos</i>      | Chromosome     | 143.0x          | PacBio RSII; PacBio Sequel                                                          | 1188533289       | GCF_015476345.1 |
| Anseriformes   | <i>Stictonetta naevosa</i>     | Chromosome     | 60.0x           | Illumina NovaSeq                                                                    | 1132698962       | GCA_011074415.1 |
| Anseriformes   | <i>Cairina moschata</i>        | Chromosome     | 128.0x          | Illumina NovaSeq                                                                    | 1118556028       | GCA_018104995.1 |
| Piciformes     | <i>Colaptes auratus</i>        | Chromosome     | 34.0x           | Illumina NovaSeq; PacBio Sequel                                                     | 1378187165       | GCA_015227895.1 |
| Piciformes     | <i>Pogoniulus pusillus</i>     | Chromosome     | 165.44x         | PacBio Sequel I CLR; Illumina NovaSeq; Arima<br>Genomics Hi-C; Bionano Genomics DLS | 1272358903       | GCA_015220805.1 |
| Bucerotiformes | <i>Bucorvus abyssinicus</i>    | Chromosome     | 66.0x           | PacBio Sequel I CLR; Illumina NovaSeq; Arima<br>Genomics Hi-C; Bionano Genomics DLS | 1132597561       | GCA_009769605.1 |

|                |                                     |            |        |                                                                                     |            |                 |
|----------------|-------------------------------------|------------|--------|-------------------------------------------------------------------------------------|------------|-----------------|
| Psittaciformes | <i>Myiopsitta monachus</i>          | Chromosome | 67.0x  | PacBio RSII                                                                         | 1168583304 | GCA_017639245.1 |
| Psittaciformes | <i>Amazona aestiva</i>              | Chromosome | 60.0x  | Illumina                                                                            | 1130393257 | GCA_017639355.1 |
| Psittaciformes | <i>Melopsittacus undulatus</i>      | Chromosome | 61.11x | PacBio Sequel I CLR; Illumina NovaSeq; Arima<br>Genomics Hi-C; Bionano Genomics DLS | 1171617451 | GCF_012275295.1 |
| Passeriformes  | <i>Rhegmatorhina<br/>hoffmannsi</i> | Chromosome | 141.0x | Illumina HiSeq                                                                      | 1066555733 | GCA_013398505.2 |
| Passeriformes  | <i>Certhia americana</i>            | Chromosome | 80.0x  | PacBio Sequel; Illumina HiSeq; Illumina<br>NovaSeq                                  | 1113356413 | GCA_018697195.1 |
| Passeriformes  | <i>Hirundo rustica</i>              | Chromosome | 51.15x | PacBio Sequel I CLR; Illumina NovaSeq; Arima<br>Genomics Hi-C; Bionano Genomics DLS | 1105955550 | GCF_015227805.1 |
| Passeriformes  | <i>Catharus ustulatus</i>           | Chromosome | 60.58x | PacBio Sequel I CLR; Illumina NovaSeq; Arima<br>Genomics Hi-C; Bionano Genomics DLS | 1131616530 | GCF_009819885.2 |
| Passeriformes  | <i>Erithacus rubecula</i>           | Chromosome | 41x    | PacBio Sequel I CLR; Illumina NovaSeq; Arima<br>Genomics Hi-C; Bionano Genomics DLS | 1086738418 | GCA_903797595.2 |
| Passeriformes  | <i>Ficedula albicollis</i>          | Chromosome | 60.0x  | Illumina GAI; Illumina HiSeq                                                        | 1118343587 | GCF_000247815.1 |
| Passeriformes  | <i>Sylvia atricapilla</i>           | Chromosome | 66.29x | PacBio Sequel I CLR; Illumina NovaSeq; Arima<br>Genomics Hi-C; Bionano Genomics DLS | 1066786587 | GCA_009819655.1 |
| Passeriformes  | <i>Sylvia borin</i>                 | Chromosome | 72.07x | PacBio Sequel I CLR; Illumina NovaSeq; Arima<br>Genomics Hi-C; Bionano Genomics DLS | 1045652180 | GCA_014839755.1 |
| Passeriformes  | <i>Acrocephalus<br/>scirpaceus</i>  | Chromosome | 200x   | Unknown                                                                             | 1075083815 | GCA_910950805.1 |
| Passeriformes  | <i>Parus major</i>                  | Chromosome | 95.0x  | Illumina HiSeq                                                                      | 1020310769 | GCF_001522545.3 |
| Passeriformes  | <i>Camarhynchus parvulus</i>        | Chromosome | 31x    | Unknown                                                                             | 1051609828 | GCF_901933205.1 |
| Passeriformes  | <i>Diglossa brunneiventris</i>      | Chromosome | 30.0x  | PacBio Sequel                                                                       | 1079473785 | GCA_019023105.1 |
| Passeriformes  | <i>Passer domesticus</i>            | Chromosome | 130.0x | Illumina HiSeq                                                                      | 1042720703 | GCA_001700915.1 |
| Passeriformes  | <i>Molothrus ater</i>               | Chromosome | 200.0x | PacBio Sequel II                                                                    | 1087312585 | GCF_012460135.1 |

|                     |                                |            |         |                                                                                      |            |                 |
|---------------------|--------------------------------|------------|---------|--------------------------------------------------------------------------------------|------------|-----------------|
| Passeriformes       | <i>Setophaga coronata</i>      | Chromosome | 100.0x  | Illumina                                                                             | 1022651334 | GCA_001746935.2 |
| Passeriformes       | <i>Geothlypis trichas</i>      | Chromosome | 52.11x  | PacBio Sequel I CLR; Illumina NovaSeq; Arima<br>Genomics Hi-C; Bionano Genomics DLS  | 1078128490 | GCA_009764595.1 |
| Passeriformes       | <i>Motacilla alba</i>          | Chromosome | 18x     | PacBio Sequel II HiFi                                                                | 1072670728 | GCF_015832195.1 |
| Passeriformes       | <i>Fringilla coelebs</i>       | Chromosome | 249.0x  | Illumina HiSeq                                                                       | 994865760  | GCA_015532645.2 |
| Passeriformes       | <i>Lonchura striata</i>        | Chromosome | 151.0x  | Illumina HiSeq                                                                       | 1060269806 | GCF_005870125.1 |
| Passeriformes       | <i>Taeniopygia guttata</i>     | Chromosome | Unknown | PacBio                                                                               | 1056271262 | GCF_003957565.2 |
| Passeriformes       | <i>Corvus moneduloides</i>     | Chromosome | 62.08x  | PacBio Sequel I; Illumina NovaSeq; Arima<br>Genomics Hi-C; Bionano Genomics DLS      | 1112734094 | GCF_009650955.1 |
| Passeriformes       | <i>Corvus monedula</i>         | Chromosome | 64.0x   | PacBio; Hi-C                                                                         | 1035863955 | GCA_013407035.1 |
| Passeriformes       | <i>Malurus cyaneus</i>         | Chromosome | 51.2x   | PacBio RSII; Illumina HiSeq; Illumina MiSeq                                          | 1078891882 | GCA_009741485.1 |
| Columbiformes       | <i>Streptopelia turtur</i>     | Chromosome | 44x     | PacBio Sequel I; Illumina NovaSeq; Arima<br>Genomics Hi-C; Bionano Genomics DLS      | 1178816852 | GCA_901699155.2 |
| Phoenicopteriformes | <i>Phoenicopus ruber</i>       | Chromosome | 61.27x  | PacBio Sequel I CLR; Illumina NovaSeq; Arima<br>Genomics Hi-C; Bionano Genomics DLS  | 1246226932 | GCA_009819775.1 |
| Ciconiiformes       | <i>Ciconia maguari</i>         | Chromosome | 88.32x  | PacBio Sequel II CLR; Illumina NovaSeq; Arima<br>Genomics Hi-C; Bionano Genomics DLS | 1239437416 | GCA_017639555.1 |
| Cathartiformes      | <i>Gymnogyps californianus</i> | Chromosome | 20.0x   | PacBio RSII; Phase Genomics HiC                                                      | 1240179868 | GCA_018139145.1 |
| Charadriiformes     | <i>Alca torda</i>              | Chromosome | 64.69x  | PacBio Sequel; Illumina NovaSeq; 10X Genome;<br>Arima Hi-C                           | 1178492568 | GCA_008658365.1 |
| Charadriiformes     | <i>Sterna hirundo</i>          | Chromosome | 67.91x  | PacBio Sequel I CLR; Illumina NovaSeq; Arima<br>Genomics Hi-C; Bionano Genomics DLS  | 1229972541 | GCA_009819605.1 |
| Charadriiformes     | <i>Pluvialis apricaria</i>     | Chromosome | 60.0x   | PacBio Sequel II CLR; Illumina NovaSeq; Arima<br>Genomics Hi-C; Bionano Genomics DLS | 1247767512 | GCA_017639485.1 |

|                  |                              |            |         |                                                                                  |            |                 |
|------------------|------------------------------|------------|---------|----------------------------------------------------------------------------------|------------|-----------------|
| Falconiformes    | <i>Falco naumanni</i>        | Chromosome | 104.34x | PacBio Sequel I CLR; Illumina NovaSeq; Arima Genomics Hi-C; Bionano Genomics DLS | 1215719661 | GCF_017639655.2 |
| Falconiformes    | <i>Falco rusticolus</i>      | Chromosome | 44.28x  | PacBio Sequel I CLR; Illumina NovaSeq; Arima Genomics Hi-C; Bionano Genomics DLS | 1195847496 | GCF_015220075.1 |
| Accipitriformes  | <i>Aquila chrysaetos</i>     | Chromosome | 60x     | PacBio Sequel I CLR; Illumina NovaSeq; Arima Genomics Hi-C; Bionano Genomics DLS | 1233704830 | GCF_900496995.4 |
| Caprimulgiformes | <i>Calypte anna</i>          | Chromosome | 54.0x   | PacBio RSII; 10X Genomics linked reads; Bionano Genomics DLS; Arima Genomics HiC | 1059687259 | GCF_003957555.1 |
| Caprimulgiformes | <i>Caprimulgus europaeus</i> | Chromosome | 87x     | PacBio                                                                           | 1177791212 | GCA_907165065.1 |
| Caprimulgiformes | <i>Nyctibius grandis</i>     | Chromosome | 88.4x   | PacBio Sequel I CLR; Illumina NovaSeq; Arima Genomics Hi-C; Bionano Genomics DLS | 1256414880 | GCA_013368605.1 |

**Table S2.** The number of different SSR types.

| Species                        | Number of three SSR types |       |         |        | Number of six P-SSR types |       |       |        |        |       |
|--------------------------------|---------------------------|-------|---------|--------|---------------------------|-------|-------|--------|--------|-------|
|                                | Total                     | C-SSR | I-SSR   | P-SSR  | Mono-                     | Di-   | Tri-  | Tetra- | Penta- | Hexa- |
| <i>Coturnix japonica</i>       | 1206213                   | 18271 | 925257  | 262685 | 133890                    | 30357 | 23844 | 50784  | 19476  | 4334  |
| <i>Meleagris gallopavo</i>     | 1265444                   | 7413  | 1022305 | 235726 | 138861                    | 25204 | 19857 | 36605  | 12414  | 2785  |
| <i>Gallus gallus</i>           | 1411711                   | 15856 | 1081648 | 314207 | 192740                    | 27640 | 24452 | 42210  | 21404  | 5761  |
| <i>Numida meleagris</i>        | 1199459                   | 6884  | 967765  | 224810 | 161606                    | 16696 | 14988 | 20530  | 8881   | 2109  |
| <i>Oxyura jamaicensis</i>      | 2005910                   | 34605 | 1413610 | 557695 | 349210                    | 46121 | 52444 | 76181  | 29319  | 4420  |
| <i>Heteronetta atricapilla</i> | 1961030                   | 30645 | 1404201 | 526184 | 331094                    | 46307 | 49410 | 70241  | 25108  | 4024  |
| <i>Cygnus olor</i>             | 1854591                   | 27228 | 1351045 | 476318 | 291568                    | 38832 | 40694 | 61821  | 32743  | 10660 |
| <i>Aythya fuligula</i>         | 2080570                   | 40930 | 1454294 | 585346 | 367470                    | 44730 | 45811 | 81765  | 35363  | 10207 |
| <i>Anas platyrhynchos</i>      | 2068309                   | 36550 | 1482880 | 548879 | 327692                    | 44738 | 43836 | 80680  | 39084  | 12849 |
| <i>Stictonetta naevosa</i>     | 1875358                   | 25268 | 1359084 | 491006 | 306880                    | 36739 | 44960 | 70680  | 26971  | 4776  |
| <i>Cairina moschata</i>        | 2004732                   | 31704 | 1426106 | 546922 | 351659                    | 44295 | 41955 | 75178  | 27824  | 6011  |
| <i>Colaptes auratus</i>        | 1630446                   | 28920 | 1286013 | 315513 | 103043                    | 30357 | 23014 | 36788  | 116021 | 6290  |
| <i>Pogoniulus pusillus</i>     | 1273033                   | 11525 | 1061581 | 199927 | 94906                     | 29543 | 27126 | 29414  | 15244  | 3694  |
| <i>Bucorvus abyssinicus</i>    | 1197660                   | 5689  | 968972  | 222999 | 163378                    | 14979 | 17369 | 14691  | 10478  | 2104  |

|                                 |         |       |         |        |        |       |       |       |       |      |
|---------------------------------|---------|-------|---------|--------|--------|-------|-------|-------|-------|------|
| <i>Myiopsitta monachus</i>      | 1193100 | 7715  | 986814  | 198571 | 129866 | 16947 | 15813 | 24443 | 9186  | 2316 |
| <i>Amazona aestiva</i>          | 935817  | 5118  | 781069  | 149630 | 104108 | 13148 | 10223 | 15460 | 5414  | 1277 |
| <i>Melopsittacus undulatus</i>  | 1124634 | 5151  | 951607  | 167876 | 102848 | 17467 | 13077 | 24928 | 6407  | 3149 |
| <i>Rhegmatorhina hoffmannsi</i> | 1037755 | 6599  | 876901  | 154255 | 76584  | 21869 | 17879 | 23508 | 10650 | 3765 |
| <i>Certhia americana</i>        | 1311143 | 15572 | 1012166 | 283405 | 185434 | 28171 | 22069 | 28241 | 14097 | 5393 |
| <i>Hirundo rustica</i>          | 1453654 | 24673 | 1075224 | 353757 | 230875 | 27580 | 26377 | 40476 | 22005 | 6444 |
| <i>Catharus ustulatus</i>       | 1248256 | 12804 | 1017876 | 217576 | 116588 | 18353 | 22001 | 34139 | 18999 | 7496 |
| <i>Erithacus rubecula</i>       | 1341694 | 18682 | 1033586 | 289426 | 172994 | 24023 | 21178 | 40120 | 23403 | 7708 |
| <i>Ficedula albicollis</i>      | 1394779 | 31267 | 1042916 | 320596 | 216726 | 21308 | 18832 | 38410 | 16383 | 8937 |
| <i>Sylvia atricapilla</i>       | 1277875 | 16507 | 990662  | 270706 | 178464 | 22582 | 22676 | 25340 | 17182 | 4462 |
| <i>Sylvia borin</i>             | 1238537 | 14941 | 975681  | 247915 | 158854 | 21280 | 23389 | 25044 | 14275 | 5073 |
| <i>Acrocephalus scirpaceus</i>  | 1162762 | 10900 | 946581  | 205281 | 118625 | 19668 | 21710 | 25991 | 14844 | 4443 |
| <i>Parus major</i>              | 1086323 | 7621  | 900149  | 178553 | 100191 | 23808 | 20132 | 19460 | 10283 | 4679 |
| <i>Camarhynchus parvulus</i>    | 1136783 | 12917 | 933498  | 190368 | 88348  | 21559 | 23694 | 30668 | 20656 | 5443 |
| <i>Diglossa brunneiventris</i>  | 1221936 | 13968 | 981917  | 226051 | 123787 | 23703 | 22361 | 31991 | 19635 | 4574 |
| <i>Passer domesticus</i>        | 1030645 | 5644  | 861297  | 163704 | 99506  | 16270 | 16408 | 19055 | 9721  | 2744 |
| <i>Molothrus ater</i>           | 1238753 | 11787 | 1005981 | 220985 | 115606 | 27267 | 26520 | 30313 | 16413 | 4866 |

|                                |         |       |         |        |        |       |       |       |       |      |
|--------------------------------|---------|-------|---------|--------|--------|-------|-------|-------|-------|------|
| <i>Setophaga coronata</i>      | 948979  | 4816  | 802844  | 141319 | 82000  | 17907 | 15420 | 16384 | 7876  | 1732 |
| <i>Geothlypis trichas</i>      | 1165658 | 13231 | 952893  | 199534 | 98540  | 25671 | 22025 | 30797 | 18631 | 3870 |
| <i>Motacilla alba</i>          | 1200479 | 12083 | 960720  | 227676 | 136111 | 23725 | 21455 | 28214 | 13701 | 4470 |
| <i>Fringilla coelebs</i>       | 1044105 | 5637  | 868571  | 169897 | 105464 | 16556 | 17704 | 18337 | 8953  | 2883 |
| <i>Lonchura striata</i>        | 1190217 | 17267 | 940324  | 232626 | 149392 | 21006 | 19996 | 22166 | 13548 | 6518 |
| <i>Taeniopygia guttata</i>     | 1247305 | 15203 | 975477  | 256625 | 160950 | 20478 | 20474 | 26615 | 21423 | 6685 |
| <i>Corvus moneduloides</i>     | 1122068 | 8963  | 918233  | 194872 | 113661 | 19692 | 19095 | 25287 | 11997 | 5140 |
| <i>Corvus monedula</i>         | 1051173 | 9068  | 856330  | 185775 | 111017 | 17366 | 16974 | 24518 | 12754 | 3146 |
| <i>Malurus cyaneus</i>         | 1276017 | 16537 | 1007121 | 252359 | 168175 | 17552 | 16935 | 26202 | 19047 | 4448 |
| <i>Streptopelia turtur</i>     | 1358590 | 12101 | 1073064 | 273425 | 177511 | 24261 | 17841 | 34784 | 15960 | 3068 |
| <i>Phoenicopterus ruber</i>    | 1376453 | 7374  | 1111063 | 258016 | 187532 | 16258 | 21178 | 19075 | 11716 | 2257 |
| <i>Ciconia maguari</i>         | 1327554 | 7439  | 1084256 | 235859 | 162002 | 18250 | 22010 | 17654 | 12823 | 3120 |
| <i>Gymnogyps californianus</i> | 1428162 | 7276  | 1149500 | 271386 | 190967 | 17281 | 29662 | 19457 | 11485 | 2534 |
| <i>Alca torda</i>              | 1503572 | 12074 | 1171425 | 320073 | 243793 | 20962 | 17500 | 22382 | 12933 | 2503 |
| <i>Sterna hirundo</i>          | 1509488 | 10890 | 1187831 | 310767 | 234262 | 20872 | 20140 | 21328 | 11602 | 2563 |
| <i>Pluvialis apricaria</i>     | 1455786 | 9294  | 1166013 | 280479 | 207134 | 18561 | 20269 | 18722 | 12356 | 3437 |
| <i>Falco naumanni</i>          | 1431181 | 11570 | 1141991 | 277620 | 202431 | 23592 | 19152 | 21244 | 8948  | 2253 |

---

|                              |         |       |         |        |        |       |       |       |       |      |
|------------------------------|---------|-------|---------|--------|--------|-------|-------|-------|-------|------|
| <i>Falco rusticolus</i>      | 1378322 | 9449  | 1111283 | 257590 | 185864 | 23100 | 18600 | 19669 | 8510  | 1847 |
| <i>Aquila chrysaetos</i>     | 1512190 | 9854  | 1180798 | 321538 | 245911 | 20247 | 23749 | 19969 | 9859  | 1803 |
| <i>Calypte anna</i>          | 1355939 | 13766 | 1073222 | 268951 | 173511 | 24237 | 19014 | 28458 | 18506 | 5225 |
| <i>Caprimulgus europaeus</i> | 1438778 | 11478 | 1161094 | 266206 | 169093 | 28206 | 22800 | 26490 | 15109 | 4508 |
| <i>Nyctibius grandis</i>     | 1288597 | 4973  | 1082013 | 201611 | 144754 | 16074 | 16916 | 13259 | 8119  | 2489 |

---



**Table S3.** The frequency of different SSR types.

| Species                         | Frequency of three SSR types |           |           | Frequency of six P-SSR types |         |          |            |            |           |
|---------------------------------|------------------------------|-----------|-----------|------------------------------|---------|----------|------------|------------|-----------|
|                                 | C-SSR (%)                    | I-SSR (%) | P-SSR (%) | Mono- (%)                    | Di- (%) | Tri- (%) | Tetra- (%) | Penta- (%) | Hexa- (%) |
| <i>Coturnix japonica</i>        | 1.51                         | 76.71     | 21.78     | 50.97                        | 11.56   | 9.08     | 19.33      | 7.41       | 1.65      |
| <i>Meleagris gallopavo</i>      | 0.59                         | 80.79     | 18.63     | 58.91                        | 10.69   | 8.42     | 15.53      | 5.27       | 1.18      |
| <i>Gallus gallus</i>            | 1.12                         | 76.62     | 22.26     | 61.34                        | 8.80    | 7.78     | 13.43      | 6.81       | 1.83      |
| <i>Numida meleagris</i>         | 0.57                         | 80.68     | 18.74     | 71.89                        | 7.43    | 6.67     | 9.13       | 3.95       | 0.94      |
| <i>Oxyura jamaicensis</i>       | 1.73                         | 70.47     | 27.80     | 62.62                        | 8.27    | 9.40     | 13.66      | 5.26       | 0.79      |
| <i>Heteronetta atricapilla</i>  | 1.56                         | 71.61     | 26.83     | 62.92                        | 8.80    | 9.39     | 13.35      | 4.77       | 0.76      |
| <i>Cygnus olor</i>              | 1.47                         | 72.85     | 25.68     | 61.21                        | 8.15    | 8.54     | 12.98      | 6.87       | 2.24      |
| <i>Aythya fuligula</i>          | 1.97                         | 69.90     | 28.13     | 62.78                        | 7.64    | 7.83     | 13.97      | 6.04       | 1.74      |
| <i>Anas platyrhynchos</i>       | 1.77                         | 71.70     | 26.54     | 59.70                        | 8.15    | 7.99     | 14.70      | 7.12       | 2.34      |
| <i>Stictonetta naevosa</i>      | 1.35                         | 72.47     | 26.18     | 62.50                        | 7.48    | 9.16     | 14.39      | 5.49       | 0.97      |
| <i>Cairina moschata</i>         | 1.58                         | 71.14     | 27.28     | 64.30                        | 8.10    | 7.67     | 13.75      | 5.09       | 1.10      |
| <i>Colaptes auratus</i>         | 1.77                         | 78.87     | 19.35     | 32.66                        | 9.62    | 7.29     | 11.66      | 36.77      | 1.99      |
| <i>Pogoniulus pusillus</i>      | 0.91                         | 83.39     | 15.70     | 47.47                        | 14.78   | 13.57    | 14.71      | 7.62       | 1.85      |
| <i>Bucorvus abyssinicus</i>     | 0.48                         | 80.91     | 18.62     | 73.26                        | 6.72    | 7.79     | 6.59       | 4.70       | 0.94      |
| <i>Myiopsitta monachus</i>      | 0.65                         | 82.71     | 16.64     | 65.40                        | 8.53    | 7.96     | 12.31      | 4.63       | 1.17      |
| <i>Amazona aestiva</i>          | 0.55                         | 83.46     | 15.99     | 69.58                        | 8.79    | 6.83     | 10.33      | 3.62       | 0.85      |
| <i>Melopsittacus undulatus</i>  | 0.46                         | 84.61     | 14.93     | 61.26                        | 10.40   | 7.79     | 14.85      | 3.82       | 1.88      |
| <i>Rhegmatorhina hoffmannsi</i> | 0.64                         | 84.50     | 14.86     | 49.65                        | 14.18   | 11.59    | 15.24      | 6.90       | 2.44      |
| <i>Certhia americana</i>        | 1.19                         | 77.20     | 21.62     | 65.43                        | 9.94    | 7.79     | 9.96       | 4.97       | 1.90      |
| <i>Hirundo rustica</i>          | 1.70                         | 73.97     | 24.34     | 65.26                        | 7.80    | 7.46     | 11.44      | 6.22       | 1.82      |
| <i>Catharus ustulatus</i>       | 1.03                         | 81.54     | 17.43     | 53.58                        | 8.44    | 10.11    | 15.69      | 8.73       | 3.45      |
| <i>Erithacus rubecula</i>       | 1.39                         | 77.04     | 21.57     | 59.77                        | 8.30    | 7.32     | 13.86      | 8.09       | 2.66      |

|                                |      |       |       |       |       |       |       |       |      |
|--------------------------------|------|-------|-------|-------|-------|-------|-------|-------|------|
| <i>Ficedula albicollis</i>     | 2.24 | 74.77 | 22.99 | 67.60 | 6.65  | 5.87  | 11.98 | 5.11  | 2.79 |
| <i>Sylvia atricapilla</i>      | 1.29 | 77.52 | 21.18 | 65.93 | 8.34  | 8.38  | 9.36  | 6.35  | 1.65 |
| <i>Sylvia borin</i>            | 1.21 | 78.78 | 20.02 | 64.08 | 8.58  | 9.43  | 10.10 | 5.76  | 2.05 |
| <i>Acrocephalus scirpaceus</i> | 0.94 | 81.41 | 17.65 | 57.79 | 9.58  | 10.58 | 12.66 | 7.23  | 2.16 |
| <i>Parus major</i>             | 0.70 | 82.86 | 16.44 | 56.11 | 13.33 | 11.28 | 10.90 | 5.76  | 2.62 |
| <i>Camarhynchus parvulus</i>   | 1.14 | 82.12 | 16.75 | 46.41 | 11.32 | 12.45 | 16.11 | 10.85 | 2.86 |
| <i>Diglossa brunneiventris</i> | 1.14 | 80.36 | 18.50 | 54.76 | 10.49 | 9.89  | 14.15 | 8.69  | 2.02 |
| <i>Passer domesticus</i>       | 0.55 | 83.57 | 15.88 | 60.78 | 9.94  | 10.02 | 11.64 | 5.94  | 1.68 |
| <i>Molothrus ater</i>          | 0.95 | 81.21 | 17.84 | 52.31 | 12.34 | 12.00 | 13.72 | 7.43  | 2.20 |
| <i>Setophaga coronata</i>      | 0.51 | 84.60 | 14.89 | 58.02 | 12.67 | 10.91 | 11.59 | 5.57  | 1.23 |
| <i>Geothlypis trichas</i>      | 1.14 | 81.75 | 17.12 | 49.39 | 12.87 | 11.04 | 15.43 | 9.34  | 1.94 |
| <i>Motacilla alba</i>          | 1.01 | 80.03 | 18.97 | 59.78 | 10.42 | 9.42  | 12.39 | 6.02  | 1.96 |
| <i>Fringilla coelebs</i>       | 0.54 | 83.19 | 16.27 | 62.08 | 9.74  | 10.42 | 10.79 | 5.27  | 1.70 |
| <i>Lonchura striata</i>        | 1.45 | 79.00 | 19.54 | 64.22 | 9.03  | 8.60  | 9.53  | 5.82  | 2.80 |
| <i>Taeniopygia guttata</i>     | 1.22 | 78.21 | 20.57 | 62.72 | 7.98  | 7.98  | 10.37 | 8.35  | 2.60 |
| <i>Corvus moneduloides</i>     | 0.80 | 81.83 | 17.37 | 58.33 | 10.11 | 9.80  | 12.98 | 6.16  | 2.64 |
| <i>Corvus monedula</i>         | 0.86 | 81.46 | 17.67 | 59.76 | 9.35  | 9.14  | 13.20 | 6.87  | 1.69 |
| <i>Malurus cyaneus</i>         | 1.30 | 78.93 | 19.78 | 66.64 | 6.96  | 6.71  | 10.38 | 7.55  | 1.76 |
| <i>Streptopelia turtur</i>     | 0.89 | 78.98 | 20.13 | 64.92 | 8.87  | 6.53  | 12.72 | 5.84  | 1.12 |
| <i>Phoenicopterus ruber</i>    | 0.54 | 80.72 | 18.74 | 72.68 | 6.30  | 8.21  | 7.39  | 4.54  | 0.87 |
| <i>Ciconia maguari</i>         | 0.56 | 81.67 | 17.77 | 68.69 | 7.74  | 9.33  | 7.48  | 5.44  | 1.32 |
| <i>Gymnogyps californianus</i> | 0.51 | 80.49 | 19.00 | 70.37 | 6.37  | 10.93 | 7.17  | 4.23  | 0.93 |
| <i>Alca torda</i>              | 0.80 | 77.91 | 21.29 | 76.17 | 6.55  | 5.47  | 6.99  | 4.04  | 0.78 |
| <i>Sterna hirundo</i>          | 0.72 | 78.69 | 20.59 | 75.38 | 6.72  | 6.48  | 6.86  | 3.73  | 0.82 |
| <i>Pluvialis apricaria</i>     | 0.64 | 80.10 | 19.27 | 73.85 | 6.62  | 7.23  | 6.68  | 4.41  | 1.23 |
| <i>Falco naumanni</i>          | 0.81 | 79.79 | 19.40 | 72.92 | 8.50  | 6.90  | 7.65  | 3.22  | 0.81 |

|                              |      |       |       |       |       |      |       |      |      |
|------------------------------|------|-------|-------|-------|-------|------|-------|------|------|
| <i>Falco rusticolus</i>      | 0.69 | 80.63 | 18.69 | 72.15 | 8.97  | 7.22 | 7.64  | 3.30 | 0.72 |
| <i>Aquila chrysaetos</i>     | 0.65 | 78.09 | 21.26 | 76.48 | 6.30  | 7.39 | 6.21  | 3.07 | 0.56 |
| <i>Calypte anna</i>          | 1.02 | 79.15 | 19.84 | 64.51 | 9.01  | 7.07 | 10.58 | 6.88 | 1.94 |
| <i>Caprimulgus europaeus</i> | 0.80 | 80.70 | 18.50 | 63.52 | 10.60 | 8.56 | 9.95  | 5.68 | 1.69 |
| <i>Nyctibius grandis</i>     | 0.39 | 83.97 | 15.65 | 71.80 | 7.97  | 8.39 | 6.58  | 4.03 | 1.23 |

**Table S4.** The top five most abundant repeat motif of P-SSRs.

| Species                         | 1st | %     | 2nd  | %     | 3rd   | %    | 4th   | %    | 5th   | %    |
|---------------------------------|-----|-------|------|-------|-------|------|-------|------|-------|------|
| <i>Coturnix japonica</i>        | A   | 46.64 | AAAT | 6.69  | AT    | 6.32 | AAAC  | 5.78 | C     | 4.33 |
| <i>Meleagris gallopavo</i>      | A   | 57.98 | AAAC | 5.87  | AT    | 4.90 | AAAT  | 4.64 | AC    | 4.09 |
| <i>Gallus gallus</i>            | A   | 54.12 | C    | 7.22  | AAAC  | 5.20 | AT    | 3.99 | AAAT  | 3.28 |
| <i>Numida meleagris</i>         | A   | 68.22 | C    | 3.66  | AT    | 3.45 | AAAC  | 2.83 | AC    | 2.70 |
| <i>Oxyura jamaicensis</i>       | A   | 57.19 | C    | 5.43  | AAAT  | 5.42 | AT    | 5.17 | AAAC  | 5.07 |
| <i>Heteronetta atricapilla</i>  | A   | 58.45 | AT   | 5.55  | AAAT  | 5.10 | AAT   | 4.89 | AAAC  | 4.82 |
| <i>Cygnus olor</i>              | A   | 55.18 | C    | 6.03  | AT    | 4.56 | AAAT  | 4.53 | AAAC  | 4.39 |
| <i>Aythya fuligula</i>          | A   | 59.42 | AAAC | 5.51  | AAAT  | 5.39 | AT    | 4.29 | AAT   | 3.36 |
| <i>Anas platyrhynchos</i>       | A   | 56.26 | AAAT | 5.85  | AAAC  | 5.44 | AT    | 4.57 | C     | 3.44 |
| <i>Stictonetta naevosa</i>      | A   | 57.86 | AAAT | 5.51  | AAAC  | 5.36 | C     | 4.65 | AAT   | 4.40 |
| <i>Cairina moschata</i>         | A   | 61.02 | AAAT | 5.73  | AAAC  | 5.18 | AT    | 4.72 | AAT   | 3.39 |
| <i>Colaptes auratus</i>         | A   | 25.42 | C    | 7.23  | AATAG | 6.82 | AAGAT | 6.61 | AATAC | 6.11 |
| <i>Pogoniulus pusillus</i>      | A   | 36.21 | C    | 11.26 | AC    | 5.49 | AT    | 5.08 | AG    | 4.21 |
| <i>Bucorvus abyssinicus</i>     | A   | 68.07 | C    | 5.19  | AC    | 3.05 | AT    | 2.32 | AGG   | 1.83 |
| <i>Myiopsitta monachus</i>      | A   | 52.36 | C    | 13.04 | AC    | 3.85 | AT    | 3.24 | AAAC  | 2.82 |
| <i>Amazona aestiva</i>          | A   | 66.74 | AAAC | 4.21  | AT    | 4.08 | AC    | 3.84 | C     | 2.84 |
| <i>Melopsittacus undulatus</i>  | A   | 44.13 | C    | 17.13 | AT    | 5.18 | AAAG  | 5.13 | AC    | 4.36 |
| <i>Rhegmatorhina hoffmannsi</i> | A   | 44.19 | AC   | 7.14  | C     | 5.46 | AT    | 4.62 | AAAC  | 4.24 |
| <i>Certhia americana</i>        | A   | 61.52 | AT   | 4.24  | AC    | 4.12 | C     | 3.91 | AAAC  | 2.68 |
| <i>Hirundo rustica</i>          | A   | 62.06 | AAAC | 5.12  | AC    | 3.22 | C     | 3.21 | AT    | 3.01 |
| <i>Catharus ustulatus</i>       | A   | 51.43 | AC   | 4.07  | AT    | 3.10 | AAAC  | 2.73 | AAT   | 2.30 |
| <i>Erithacus rubecula</i>       | A   | 56.93 | AAGG | 4.03  | AT    | 3.38 | AC    | 3.34 | C     | 2.84 |
| <i>Ficedula albicollis</i>      | A   | 45.15 | C    | 22.45 | ATCC  | 4.44 | AC    | 2.83 | AT    | 2.65 |

|                                |   |       |      |       |      |      |      |      |      |      |
|--------------------------------|---|-------|------|-------|------|------|------|------|------|------|
| <i>Sylvia atricapilla</i>      | A | 63.82 | AT   | 3.59  | AAAC | 3.41 | AC   | 3.08 | C    | 2.10 |
| <i>Sylvia borin</i>            | A | 61.9  | AAAC | 3.81  | AT   | 3.53 | AC   | 3.17 | C    | 2.18 |
| <i>Acrocephalus scirpaceus</i> | A | 55.24 | AT   | 4.11  | AC   | 3.55 | AAAC | 3.00 | AAT  | 2.64 |
| <i>Parus major</i>             | A | 55.09 | AT   | 6.76  | AC   | 4.74 | AAT  | 3.23 | AAAC | 2.58 |
| <i>Camarhynchus parvulus</i>   | A | 44.68 | AC   | 4.85  | AT   | 4.63 | AAAC | 2.95 | AGG  | 2.82 |
| <i>Diglossa brunneiventris</i> | A | 52.19 | AC   | 4.6   | AT   | 4.15 | ATCC | 3.18 | C    | 2.57 |
| <i>Passer domesticus</i>       | A | 60.05 | AC   | 4.29  | AT   | 3.99 | AAAC | 3.42 | AAT  | 2.21 |
| <i>Molothrus ater</i>          | A | 48.98 | AC   | 5.11  | AT   | 4.91 | ATCC | 3.56 | C    | 3.33 |
| <i>Setophaga coronata</i>      | A | 57.54 | AT   | 6.19  | AC   | 4.66 | AAT  | 3.13 | AAAC | 3.06 |
| <i>Geothlypis trichas</i>      | A | 46.65 | AT   | 5.88  | AC   | 4.84 | AAGG | 2.84 | C    | 2.73 |
| <i>Motacilla alba</i>          | A | 56.84 | AT   | 4.62  | AC   | 4.10 | C    | 2.95 | AAAC | 2.80 |
| <i>Fringilla coelebs</i>       | A | 60.55 | AC   | 4.17  | AT   | 4.03 | AAAC | 2.61 | AAT  | 2.31 |
| <i>Lonchura striata</i>        | A | 62.42 | AT   | 4.42  | AC   | 3.36 | AAAC | 2.81 | AGG  | 2.18 |
| <i>Taeniopygia guttata</i>     | A | 59.91 | AT   | 3.65  | AC   | 3.12 | C    | 2.81 | ATCC | 2.47 |
| <i>Corvus moneduloides</i>     | A | 52.95 | C    | 5.38  | AC   | 4.15 | AT   | 4.01 | AAGG | 3.33 |
| <i>Corvus monedula</i>         | A | 55.14 | C    | 4.62  | AT   | 3.98 | AC   | 3.65 | AAGG | 3.52 |
| <i>Malurus cyaneus</i>         | A | 64.55 | AC   | 2.97  | AT   | 2.60 | C    | 2.09 | AAT  | 1.72 |
| <i>Streptopelia turtur</i>     | A | 62.58 | AAAC | 6.39  | AT   | 5.02 | AC   | 3.00 | C    | 2.34 |
| <i>Phoenicopterus ruber</i>    | A | 62.78 | C    | 9.91  | AC   | 2.86 | AAT  | 2.31 | AAAC | 2.02 |
| <i>Ciconia maguari</i>         | A | 57.66 | C    | 11.03 | AC   | 3.29 | AAT  | 2.97 | AT   | 2.52 |
| <i>Gymnogyps californianus</i> | A | 59.53 | C    | 10.84 | AAT  | 4.05 | AC   | 3.30 | AGG  | 2.16 |
| <i>Alca torda</i>              | A | 67.67 | C    | 8.5   | AC   | 2.85 | AT   | 2.40 | AAAC | 1.68 |
| <i>Sterna hirundo</i>          | A | 65.71 | C    | 9.68  | AC   | 3.17 | AT   | 2.10 | AAAC | 1.66 |
| <i>Pluvialis apricaria</i>     | A | 61.72 | C    | 12.13 | AC   | 3.63 | AGG  | 1.76 | AAAC | 1.68 |
| <i>Falco naumanni</i>          | A | 60.06 | C    | 12.86 | AC   | 4.04 | AT   | 3.34 | AAAC | 2.03 |
| <i>Falco rusticolus</i>        | A | 60.23 | C    | 11.93 | AC   | 4.24 | AT   | 3.55 | AAAC | 2.06 |

|                              |   |       |    |       |    |      |      |      |      |      |
|------------------------------|---|-------|----|-------|----|------|------|------|------|------|
| <i>Aquila chrysaetos</i>     | A | 61.41 | C  | 15.07 | AC | 2.90 | AT   | 2.17 | AAAC | 1.85 |
| <i>Calypte anna</i>          | A | 61.41 | AT | 3.98  | AC | 3.47 | AAAC | 3.18 | C    | 3.10 |
| <i>Caprimulgus europaeus</i> | A | 59.72 | AT | 4.85  | AC | 4.29 | C    | 3.80 | AAAC | 2.93 |
| <i>Nyctibius grandis</i>     | A | 67.11 | C  | 4.69  | AC | 3.41 | AAT  | 2.83 | AT   | 2.78 |

**Table S5.** The most abundant repeat motif of six P-SSR types.

| Species                         | Mono- | %     | Di- | %     | Tri- | %     | Tetra- | %    | Penta- | %    | Hexa-  | %    |
|---------------------------------|-------|-------|-----|-------|------|-------|--------|------|--------|------|--------|------|
| <i>Coturnix japonica</i>        | A     | 46.64 | AT  | 6.32  | AAT  | 4.01  | AAAT   | 6.69 | AAAAC  | 1.41 | AAAAAG | 0.40 |
| <i>Meleagris gallopavo</i>      | A     | 57.98 | AT  | 4.90  | AAT  | 2.87  | AAAC   | 5.87 | AAAAC  | 1.57 | AATCCC | 0.27 |
| <i>Gallus gallus</i>            | A     | 54.12 | AT  | 3.99  | AAT  | 2.37  | AAAC   | 5.20 | AAAAC  | 1.13 | AACCCT | 0.84 |
| <i>Numida meleagris</i>         | A     | 68.22 | AT  | 3.45  | AAT  | 1.86  | AAAC   | 2.83 | AAAAC  | 0.78 | AAAAAG | 0.13 |
| <i>Oxyura jamaicensis</i>       | A     | 57.19 | AT  | 5.17  | AAT  | 4.85  | AAAT   | 5.42 | AAAAC  | 1.53 | AAAAAG | 0.18 |
| <i>Heteronetta atricapilla</i>  | A     | 58.45 | AT  | 5.55  | AAT  | 4.89  | AAAT   | 5.10 | AAAAC  | 1.25 | AAAAAG | 0.17 |
| <i>Cygnus olor</i>              | A     | 55.18 | AT  | 4.56  | AAT  | 3.53  | AAAT   | 4.53 | AAAAC  | 1.27 | AAAAAG | 0.51 |
| <i>Aythya fuligula</i>          | A     | 59.42 | AT  | 4.29  | AAT  | 3.36  | AAAC   | 5.51 | AAAAC  | 1.76 | AATCCC | 0.28 |
| <i>Anas platyrhynchos</i>       | A     | 56.26 | AT  | 4.57  | AAT  | 3.42  | AAAT   | 5.85 | AAAAT  | 1.82 | AATCCC | 0.93 |
| <i>Stictonetta naevosa</i>      | A     | 57.86 | AT  | 4.34  | AAT  | 4.40  | AAAT   | 5.51 | AAAAC  | 1.60 | AAAAAG | 0.21 |
| <i>Cairina moschata</i>         | A     | 61.02 | AT  | 4.72  | AAT  | 3.39  | AAAT   | 5.73 | AAAAT  | 1.61 | AAAAAT | 0.17 |
| <i>Colaptes auratus</i>         | A     | 25.42 | AC  | 3.99  | AAT  | 1.46  | AAAC   | 2.97 | AATAG  | 6.82 | AAAAAG | 0.24 |
| <i>Pogoniulus pusillus</i>      | A     | 36.21 | AC  | 5.49  | ACG  | 3.56  | AAAC   | 3.42 | AGAGG  | 0.84 | AAAAAG | 0.30 |
| <i>Bucorvus abyssinicus</i>     | A     | 68.07 | AC  | 3.05  | AGG  | 1.83  | AAAC   | 1.74 | AAGGG  | 0.83 | AAAAAG | 0.09 |
| <i>Myiopsitta monachus</i>      | A     | 52.36 | AC  | 3.85  | AAT  | 2.06  | AAAC   | 2.82 | AAAAC  | 0.82 | AACCCT | 0.15 |
| <i>Amazona aestiva</i>          | A     | 66.74 | AT  | 4.08  | AAT  | 2.10  | AAAC   | 4.21 | AAAAC  | 1.41 | AACCCT | 0.14 |
| <i>Melopsittacus undulatus</i>  | A     | 44.13 | AT  | 5.18  | AAT  | 2.41  | AAAG   | 5.13 | ATCCC  | 0.60 | AATCCC | 0.92 |
| <i>Rhegmatorhina hoffmannsi</i> | A     | 44.19 | AC  | 19.83 | AGG  | 19.31 | AAAC   | 4.24 | AAAAC  | 1.00 | ACAGGG | 0.22 |
| <i>Certhia americana</i>        | A     | 61.52 | AT  | 4.24  | AAT  | 1.99  | AAAC   | 2.68 | AAAAC  | 0.74 | ACAGGG | 0.16 |
| <i>Hirundo rustica</i>          | A     | 62.06 | AC  | 3.22  | AAC  | 2.26  | AAAC   | 5.12 | AAAAC  | 1.45 | ACAGGG | 0.18 |
| <i>Catharus ustulatus</i>       | A     | 51.43 | AC  | 4.07  | AAT  | 2.30  | AAAC   | 2.73 | ATCCC  | 1.22 | ACAGGG | 0.43 |
| <i>Erithacus rubecula</i>       | A     | 56.93 | AT  | 3.38  | AAT  | 1.55  | AAGG   | 4.03 | AGAGG  | 1.22 | ACAGGG | 0.26 |
| <i>Ficedula albicollis</i>      | A     | 45.15 | AC  | 2.83  | AAT  | 1.40  | ATCC   | 4.44 | AAAAC  | 0.80 | AATCCC | 0.23 |

|                                |   |       |    |      |     |      |      |      |       |      |        |      |
|--------------------------------|---|-------|----|------|-----|------|------|------|-------|------|--------|------|
| <i>Sylvia atricapilla</i>      | A | 63.82 | AT | 3.59 | AAT | 1.98 | AAAC | 3.41 | AAAAC | 1.19 | AAAAAG | 0.18 |
| <i>Sylvia borin</i>            | A | 61.90 | AT | 3.53 | AAT | 2.10 | AAAC | 3.81 | AAAAC | 1.26 | ACAGGG | 0.24 |
| <i>Acrocephalus scirpaceus</i> | A | 55.24 | AT | 4.11 | AAT | 2.64 | AAAC | 3.00 | AAAAT | 0.83 | AAAAAG | 0.25 |
| <i>Parus major</i>             | A | 55.09 | AT | 6.76 | AAT | 3.23 | AAAC | 2.58 | AAAAT | 0.95 | AAATAT | 0.23 |
| <i>Camarhynchus parvulus</i>   | A | 44.68 | AC | 4.85 | AGG | 2.82 | AAAC | 2.95 | AATAT | 1.29 | ACAGGG | 0.23 |
| <i>Diglossa brunneiventris</i> | A | 52.19 | AC | 4.60 | AAT | 2.17 | ATCC | 3.18 | AATAT | 1.24 | AAAAAG | 0.17 |
| <i>Passer domesticus</i>       | A | 60.05 | AC | 4.29 | AAT | 2.21 | AAAC | 3.42 | AAAAC | 1.05 | AAAAAG | 0.16 |
| <i>Molothrus ater</i>          | A | 48.98 | AC | 5.11 | AGG | 2.64 | ATCC | 3.56 | ATCCC | 0.93 | ACAGGG | 0.19 |
| <i>Setophaga coronata</i>      | A | 57.54 | AT | 6.19 | AAT | 3.13 | AAAC | 3.06 | AATAT | 0.83 | AAATAT | 0.12 |
| <i>Geothlypis trichas</i>      | A | 46.65 | AT | 5.88 | AAT | 2.59 | AAGG | 2.84 | AATAT | 1.38 | AAATAT | 0.15 |
| <i>Motacilla alba</i>          | A | 56.84 | AT | 4.62 | AAT | 2.03 | AAAC | 2.80 | AAAAC | 0.85 | AAAAAG | 0.16 |
| <i>Fringilla coelebs</i>       | A | 60.55 | AC | 4.17 | AAT | 2.31 | AAAC | 2.61 | AAAAC | 0.68 | ATATAG | 0.14 |
| <i>Lonchura striata</i>        | A | 62.42 | AT | 4.42 | AGG | 2.18 | AAAC | 2.81 | AAAAC | 0.98 | ATATAG | 0.21 |
| <i>Taeniopygia guttata</i>     | A | 59.91 | AT | 3.65 | AGG | 1.96 | ATCC | 2.47 | AAGGG | 1.55 | ACAGGG | 0.24 |
| <i>Corvus moneduloides</i>     | A | 52.95 | AC | 4.15 | AGG | 2.59 | AAGG | 3.33 | ATCCC | 0.83 | AATCCC | 0.89 |
| <i>Corvus monedula</i>         | A | 55.14 | AT | 3.98 | AAT | 2.10 | AAGG | 3.52 | AAGGG | 1.01 | AAAAAG | 0.23 |
| <i>Malurus cyaneus</i>         | A | 64.55 | AC | 2.97 | AAT | 1.72 | AAAC | 1.64 | AGAGG | 1.32 | ACAGGG | 0.19 |
| <i>Streptopelia turtur</i>     | A | 62.58 | AT | 5.02 | AAC | 1.98 | AAAC | 6.39 | AAAAC | 1.44 | AAAAAG | 0.13 |
| <i>Phoenicopterus ruber</i>    | A | 62.78 | AC | 2.86 | AAT | 2.31 | AAAC | 2.02 | AAAAC | 0.58 | CCCCGG | 0.14 |
| <i>Ciconia maguari</i>         | A | 57.66 | AC | 3.29 | AAT | 2.97 | AAAC | 2.10 | AAAAC | 0.60 | CCCCGG | 0.22 |
| <i>Gymnogyps californianus</i> | A | 59.53 | AC | 3.30 | AAT | 4.05 | AAAC | 1.91 | AAAAC | 0.45 | CCCCGG | 0.13 |
| <i>Alca torda</i>              | A | 67.67 | AC | 2.85 | AGG | 1.41 | AAAC | 1.68 | AAAAC | 0.65 | AAAAAG | 0.13 |
| <i>Sterna hirundo</i>          | A | 65.71 | AC | 3.17 | AGG | 1.62 | AAAC | 1.66 | AAAAC | 0.57 | AAAAAG | 0.16 |
| <i>Pluvialis apricaria</i>     | A | 61.72 | AC | 3.63 | AGG | 1.76 | AAAC | 1.68 | AAAAC | 0.54 | AAAAAG | 0.15 |
| <i>Falco naumanni</i>          | A | 60.06 | AC | 4.04 | AAT | 1.77 | AAAC | 2.03 | AAAAC | 0.50 | AATCCC | 0.13 |
| <i>Falco rusticolus</i>        | A | 60.23 | AC | 4.24 | AAT | 1.81 | AAAC | 2.06 | AAAAC | 0.52 | AAAAAG | 0.07 |



|                              |   |       |    |      |     |      |      |      |       |      |        |      |
|------------------------------|---|-------|----|------|-----|------|------|------|-------|------|--------|------|
| <i>Aquila chrysaetos</i>     | A | 61.41 | AC | 2.90 | AAT | 1.71 | AAAC | 1.85 | AAAAC | 0.52 | CCCCGG | 0.11 |
| <i>Calypte anna</i>          | A | 61.41 | AT | 3.98 | AAT | 1.96 | AAAC | 3.18 | AAAAC | 1.05 | AAAAAG | 0.32 |
| <i>Caprimulgus europaeus</i> | A | 59.72 | AT | 4.85 | AAT | 2.75 | AAAC | 2.93 | AAAAT | 0.91 | AAAAAG | 0.31 |
| <i>Nyctibius grandis</i>     | A | 67.11 | AC | 3.41 | AAT | 2.83 | AAAC | 1.79 | AAAAC | 0.61 | AAAAAG | 0.21 |
